# Supplementary material for: Trop-2 in Upper Tract Urothelial Carcinoma
Source: MDPI journal article supplement (doi:10.3390/curroncol29060312), 2022-05-30
Supplement: s1 [file s1]

**Table S1.** Univariate and multivariate analyses of progression-free survival in patients with upper tract urothelial carcinoma in RNA sequencing analysis.

| Variable                              | Progression-free survival |            |          |              |            |         |
|---------------------------------------|---------------------------|------------|----------|--------------|------------|---------|
|                                       | Univariate                |            |          | Multivariate |            |         |
|                                       | HR                        | 95 %CI     | p        | HR           | 95 %CI     | p       |
| All cases (n = 72)                    |                           |            |          |              |            |         |
| Sex (male/female)                     | 0.58                      | 0.25–1.34  | 0.20     |              |            |         |
| Age (70 < / ≤ 70) years               | 1.13                      | 0.50–2.57  | 0.77     |              |            |         |
| Tumor site (pelvis/ureter)            | 0.80                      | 0.34–1.88  | 0.61     |              |            |         |
| Tumor grade (high/low)                | 1.93                      | 0.45–8.23  | 0.38     |              |            |         |
| pT stage (MI/NMI)                     | 4.13                      | 1.64–10.38 | 0.0026** | 2.47         | 0.14–1.15  | 0.090*  |
| Lymphovascular invasion (Yes/No)      | 3.52                      | 1.59–7.80  | 0.0019** | 1.86         | 0.72–4.77  | 0.20    |
| Lymph node involvement (Yes/No)       | 3.35                      | 1.31–8.57  | 0.012**  | 1.56         | 0.55–4.46  | 0.40    |
| Adjuvant chemotherapy (Yes/No)        | 2.45                      | 1.05–5.68  | 0.038**  | 1.68         | 0.61–4.64  | 0.32    |
| TACSTD2 expression (high/low)         | 0.47                      | 0.21–1.06  | 0.069*   | 1.92         | 0.78–4.74  | 0.16    |
| High-risk group <sup>†</sup> (n = 33) |                           |            |          |              |            |         |
| Sex (male/female)                     | 0.71                      | 0.26–1.93  | 0.51     | 0.51         | 0.14–1.81  | 0.30    |
| Age (70 < / ≤ 70)                     | 0.92                      | 0.34–2.46  | 0.86     | 0.70         | 0.15–3.17  | 0.64    |
| Tumor site (pelvis/ureter)            | 0.78                      | 0.28–2.15  | 0.63     | 0.80         | 0.20–3.21  | 0.76    |
| Adjuvant chemotherapy (Yes/No)        | 0.98                      | 0.35–2.74  | 0.97     | 1.36         | 0.33–5.67  | 0.67    |
| TACSTD2 expression (high/low)         | 0.33                      | 0.11–0.95  | 0.039**  | 0.21         | 0.057–0.75 | 0.017** |

Abbreviations: CI, confidence interval; HR, hazard ratio; MI, muscle invasive; NMI, non-muscle invasive.

<sup>†</sup> High-risk group is defined as patients with a pathologic stage of ≥ pT3 or positive lymphatic invasion or lymph node metastasis; \*\*p < 0.05 and \*p < 0.1.

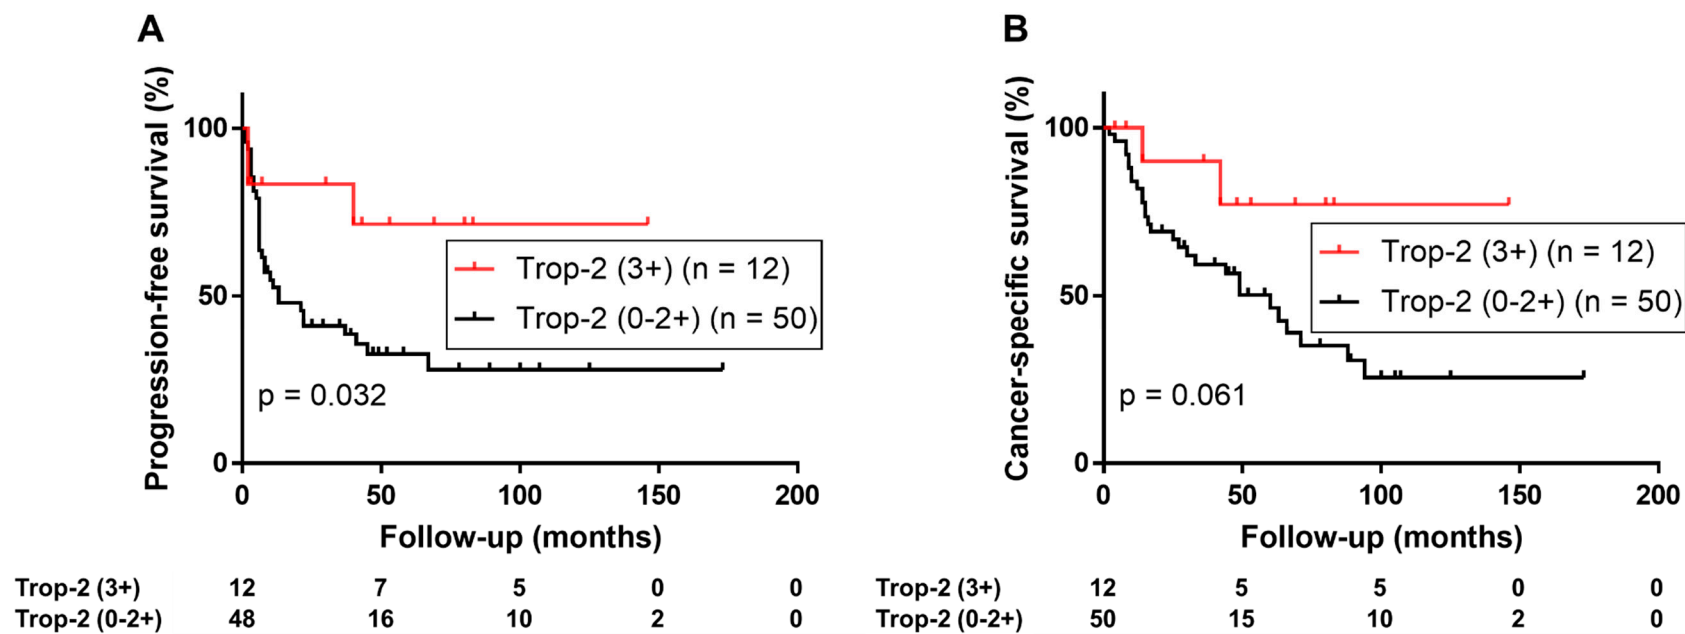

**Figure S1.** Progression-free survival (A) and cancer-specific survival (B) in 62 patients with muscle-invasive upper tract urothelial carcinoma stratified by the expression of Trop-2 (0/1+/2+ vs 3+).
